# Supplementary material for: An Insulin-to-Insulin Regulatory Network Orchestrates Phenotypic Specificity in Development and Physiology
Source: PLOS journal article supplement (doi:10.1371/journal.pgen.1004225), 2014-03-27

Supplemental Figure 1

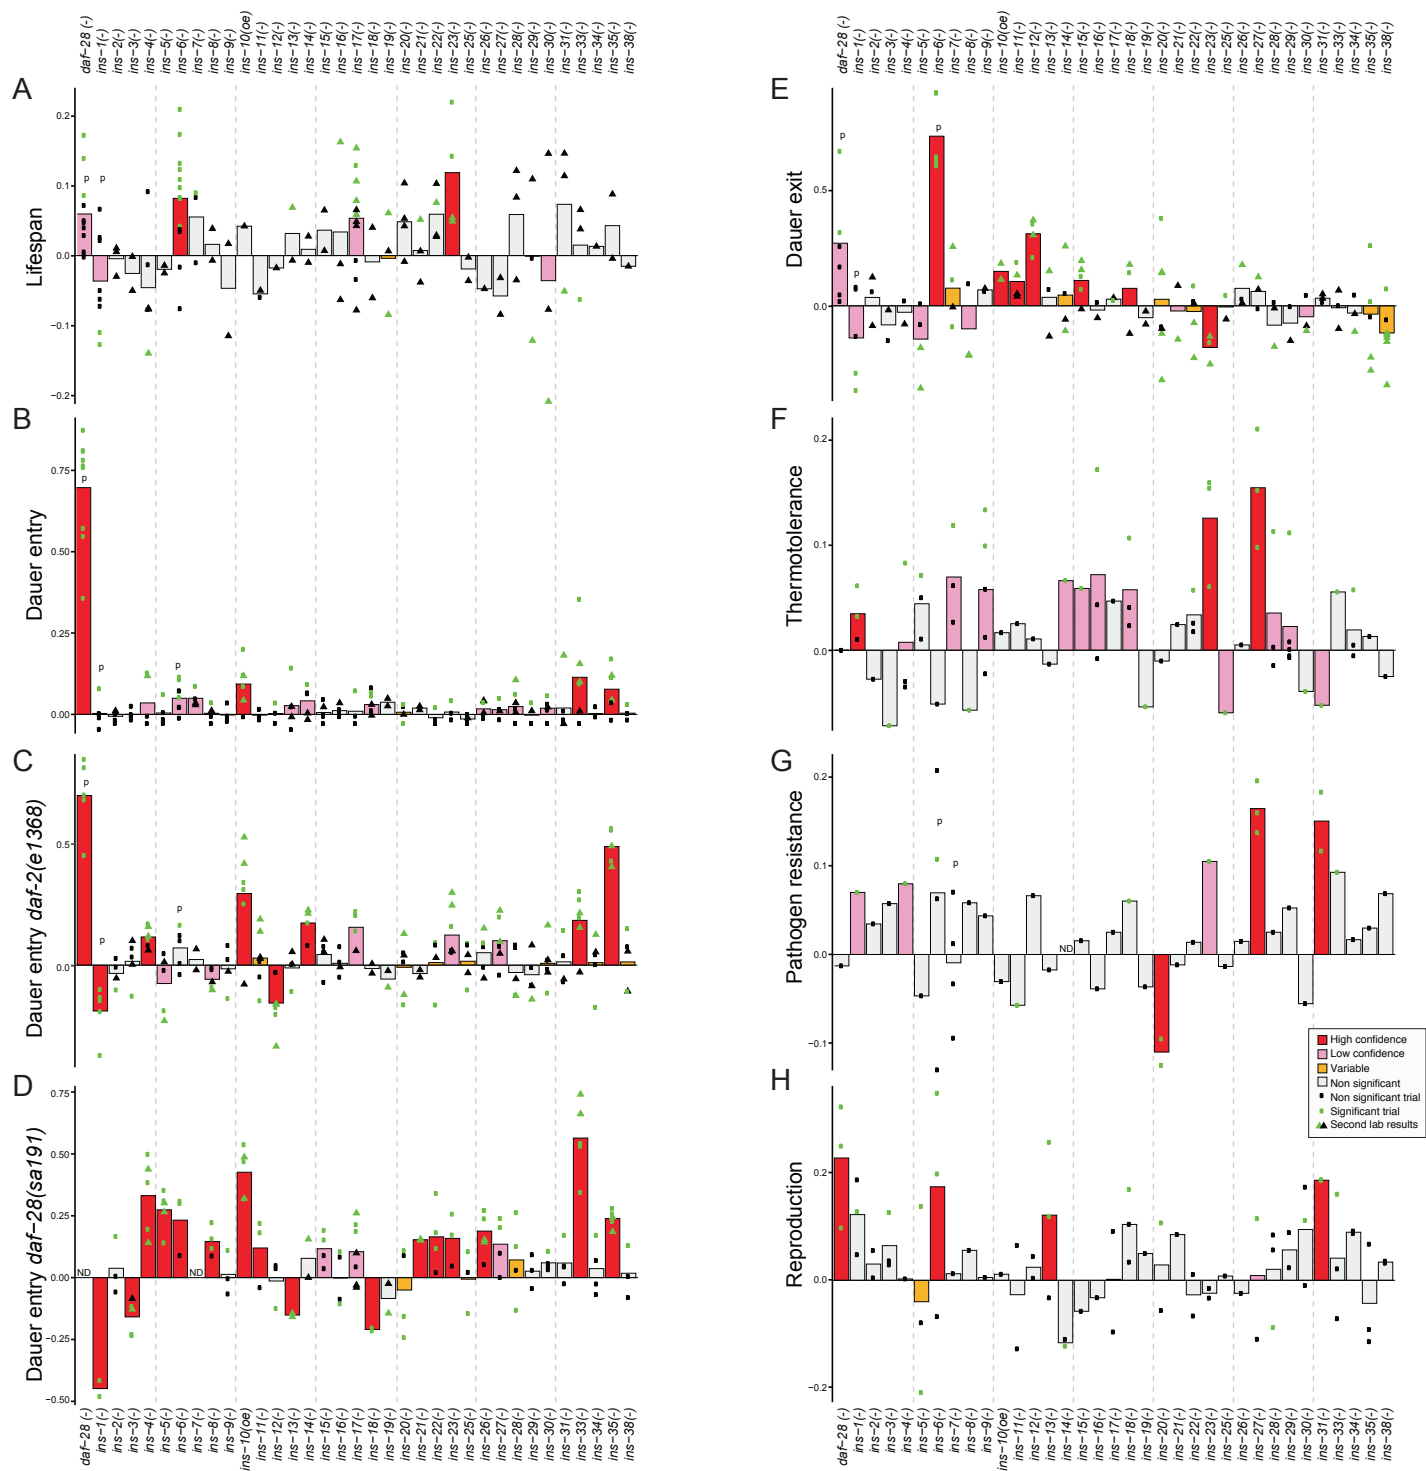

Supplement: S1 (10.1371/journal.pgen.1004225.s001) [file journal.pgen.1004225.s001]
