# Supplementary material for: An Insulin-to-Insulin Regulatory Network Orchestrates Phenotypic Specificity in Development and Physiology
Source: PLoS Genet. 2014 Mar 27;10(3):e1004225. doi: 10.1371/journal.pgen.1004225 (PMC3967928; doi:10.1371/journal.pgen.1004225)
Supplement: Table S3 — Rescue experiments. For each experiment, the strain used for each rescue experiment is indicated in parenthesis after the genotype tested. Effect refers to the p-value significance difference between the mutant versus the control strains. Rescue Effect refers to the p-value significant difference between the mutant strain with and without a rescuing transgene. Rescued Effect indicates the p-value significance difference between the mutant strain with a rescuing transgene and the control strain. (*) For the ins-14 rescue experiments, data from two trials (DA R3 and DA R4) were pooled together to obtain sufficient power for statistical analysis. (XLSX) [file pgen.1004225.s006.xlsx]

## Sheet: Sheet1
Table S3 - Rescue experiments
		Control			Mutant			Rescued			P values (Fisher test)
Dauer entry	Trial	Dauer	L4	Ratio	Dauer	L4	Ratio	Dauer	L4	Ratio	Effect	Rescue Effect	Rescued Effect	Summary
daf-28(sa191); ins-3(tm3608) (QL485)	A R16	50	52	0.490196	17	47	0.265625	5	43	0.104167	0.00555244	0.0529296	3.318e-06	No Rescue
daf-28(sa191); ins-3(tm3608) (QL486)	A R16	50	52	0.490196	22	93	0.191304	4	21	0.16	3.36191e-06	1	0.00302	No Rescue
daf-28(sa191); ins-3(tm3608) (QL486)	DA R14	64	38	0.627451	18	61	0.227848	12	107	0.10084	9.32146e-08	0.0246703	4.74054e-17	Rescue
daf-28(sa191); ins-3(tm3608) (QL486)	DA R15	67	28	0.705263	13	60	0.178082	13	114	0.102362	6.58882e-12	0.132654	4.84949e-21	No Rescue
daf-28(sa191);ins-3(tm3608) (QL705)	DA R15	67	28	0.705263	56	46	0.54902	15	104	0.12605	0.0275653	2.16839e-11	1.11486e-18	Rescue
daf-28(sa191);ins-4(tm3620) (QL462)	DA R11	24	70	0.255319	127	71	0.641414	1	61	0.016129	5.30515e-10	5.89799e-21	2.66367e-05	Rescue
daf-28(sa191);ins-5(tm2560) (QL271)	DA R9	92	110	0.455446	35	15	0.7	28	118	0.191781	0.00250392	2.0617e-10	2.39173e-07	Rescue
daf-28(sa191);ins-5(tm2560) (QL271)	DA R10	101	157	0.391473	43	17	0.716667	22	126	0.148649	6.00481e-06	5.24246e-15	1.82663e-07	Rescue
daf-28(sa191); ins-21(tm5180) (QL473)	DA R17	49	70	0.411765	83	44	0.653543	65	13	0.833333	0.000196255	0.00617118	2.34202e-09	Rescue
daf-28(sa191); ins-21(tm5180)(QL474)	DA R15	67	28	0.705263	31	4	0.885714	117	21	0.847826	0.0394417	0.788419	0.0135765	No Rescue
daf-28(sa191); ins-21(tm5180)(QL474)	DA R17	49	70	0.411765	75	36	0.675676	44	13	0.77193	6.97314e-05	0.214045	9.91513e-06	No Rescue
daf-28(sa191);ins-26(tm1983) (QL348)	DA R10	101	157	0.391473	67	45	0.598214	50	103	0.326797	0.000274603	1.82996e-05	0.204947	Rescue
daf-2(e1368);ins-12(tm2918) (QL461)	DA R5	38	108	0.260274	6	133	0.0431655	41	107	0.277027	1.70943e-07	4.25808e-08	0.79307	Rescue
daf-2(e1368);ins-12(tm2918) (QL461)	DA R6	35	101	0.257353	5	129	0.0373134	21	121	0.147887	2.11826e-07	0.0017163	0.025334	Rescue
daf-2(e1368);ins-14(tm4886) (QL316)	DA R3	11	29	0.275	33	46	0.417722	29	111	0.207143	0.160616	0.00163662	0.391152	Rescue
daf-2(e1368);ins-14(tm4886) (QL316)	DA R4	16	36	0.307692	38	47	0.447059	28	110	0.202899	0.149178	0.000147561	0.176032	Rescue
daf-2(e1368);ins-14(tm4886) (QL316) (*)	DA R3/R4	27	65	0.415	71	93	0.763	57	221	0.257	0.032	5.57e-06	0.086	Rescue
daf-2(e1368); ins-33(tm2988) (QL312)	DA R1	42	109	0.278146	20	24	0.454545	14	155	0.0828402	0.0419472	6.54446e-08	6.33052e-06	Rescue
daf-2(e1368);ins-35(ok3297) (QL310)	DA R2	26	120	0.178082	15	18	0.454545	11	149	0.06875	0.0021458	3.09779e-07	0.00453468	Rescue
		Control			Mutant			Rescued			P values (Fisher test)
Dauer exit	Trial	Mean	SE		Mean	SE		Mean	SE		Effect	Rescue Effect	Rescued Effect	Summary
daf-2(e1368);ins-12(tm2918) (QL461)	DA R13	146.33	5.95764		202.208	4.90306		150.776	5.24788		8.59393e-11	1.40202e-11	0.766514	Rescue
daf-2(e1368);ins-15(ok3444) (QL454)	DA R13	146.33	5.95764		178.019	5.99469		143.847	4.64328		0.00114575	1.36599e-05	0.49865	Rescue
		Control			Mutant			Rescued			P values (Fisher test)
Lifespan	Trial	Mean	SE		Mean	SE		Mean	SE		Effect	Rescue Effect	Rescued Effect	Summary
ins-23(tm1875) (QL273)	DA R12	17.7105	0.422948		21.0718	0.613738		18.156	0.520639		1.48324e-08	4.10061e-05	0.211324	Rescue
		Control			Mutant			Rescued			P values (Fisher test)
Pathogen resistance	Trial	Mean	SE		Mean	SE		Mean	SE		Effect	Rescue Effect	Rescued Effect	Summary
ins-27(ok2474) (ZC2347)	Yu_A	47.03	0.93		51.15	1.13		44.88	0.96		0.0033	0	0.1171	Rescue
ins-27(ok2474) (ZC2347)	Yu_B	45.25	0.73		49.58	1.03		44.92	0.76		0.0003	0.0004	0.9608	Rescue
ins-27(ok2474) (ZC2347)	Yu_C	46.35	0.86		50.62	1.05		44.78	0.82		0.0016	0	0.1909	Rescue
ins-31(ok3543) (ZC2349)	Yu_A	47.03	0.93		51.73	1.07		48.12	1.1		0.0014	0.0375	0.2791	Rescue
ins-31(ok3543) (ZC2349)	Yu_B	45.25	0.73		50.23	1.06		47.74	1.18		0.0002	0.2342	0.0318	No Rescue
ins-31(ok3543) (ZC2349)	Yu_C	46.35	0.86		51.58	1.13		49.49	1.17		0.0003	0.2025	0.0199	No Rescue
ins-31(ok3543) (QL656)	Yu_D	46.2825	0.689107		48.5916	0.777995		45.6481	0.557591		0.0276277	0.00201056	0.453569	Rescue
ins-31(ok3543) (QL657)	Yu_G	47.4166	0.853048		51.3851	1.09164		50.9027	1.05719		0.00481515	0.870199	0.00585054	No Rescue
ins-31(ok3543) (QL658)	Yu_D	46.2825	0.689107		49.102	0.858308		46.881	0.766883		0.0144148	0.0422069	0.630365	Rescue
ins-31(ok3543) (QL658)	Yu_F	48.72	0.946302		52.0881	1.13502		49.5025	1.03446		0.0161416	0.0817777	0.517495	No Rescue
ins-31(ok3543) (QL658)	Yu_G	47.4166	0.853048		52.5795	1.05551		49.226	0.983108		0.000218441	0.0155508	0.152147	Rescue
		Control			Mutant			Rescued			P values (Fisher test)
Thermotolerance	Trial	Mean	SE		Mean	SE		Mean	SE		Effect	Rescue Effect	Rescued Effect	Summary
ins-27(ok2474) (ZC2347)	B2	82.49	0.2		84.97	0.29		82.58	0.22		0	0	0.5174	Rescue
		Control			Mutant			Rescued			P values (Fisher test)
Reproductive Span	Trial	Mean	SE		Mean	SE		Mean	SE		Effect	Rescue Effect	Rescued Effect	Summary
ins-31(ok3543) (QL658)	RS1	3.79	0.13		4.75	0.15		3.97	0.1		7.6e-06	0.0001	0.3294	Rescue
