# Supplementary material for: An Insulin-to-Insulin Regulatory Network Orchestrates Phenotypic Specificity in Development and Physiology
Source: PLoS Genet. 2014 Mar 27;10(3):e1004225. doi: 10.1371/journal.pgen.1004225 (PMC3967928; doi:10.1371/journal.pgen.1004225)
Supplement: Table S4 — qPCR primer list. (XLSX) [file pgen.1004225.s007.xlsx]

## Sheet: Sheet1
Table S4 - qPCR primer list
qS assay ID	Primer name	Primer sequence
cel_pmp-3_001	cel_pmp-3_001 fwd	tcgctgaaacaattccatga
(C54G10.3)	cel_pmp-3_001 rev	caatgtcgtgaagggaccat
cel_Y45F10D.4_001	cel_Y45F10D.4_001 fwd	aagcgtcggaacaggaatc
	cel_Y45F10D.4_001 rev	ttttccgttatcgtcgactc
cel_daf-28_001	cel_daf-28_001 fwd	agtccgtgttccaggtgt
(Y116F11B.1)	cel_daf-28_001 rev	tgttgcgatgtcaattcctt
cel_ins-1_001	cel_ins-1_001 fwd	gcactggattaaccgctttc
(F13B12.5)	cel_ins-1_001 rev	cacaacattctgtcgcaattc
cel_ins-2_001	cel_ins-2_001 fwd	cgtgcctcaagagtccaga
(ZK75.2)	cel_ins-2_001 rev	atgcagcaaatatgcgaaagg
cel_ins-3_001	cel_ins-3_001 fwd	tcactccctgatggccagat
(ZK75.3)	cel_ins-3_001 rev	ctattttccagccacagcact
cel_ins-4_001	cel_ins-4_001 fwd	aaaatcaactctcccgagca
(ZK75.1)	cel_ins-4_001 rev	gcaatgtccatgtcctcttgt
cel_ ins-5_002	cel_ ins-5_002 fwd	caaggcttcatcctgtcgtc
(ZK84.3)	cel_ ins-5_002 rev	tcaaatgggcagcagatttct
cel_ ins-6_002	cel_ ins-6_002 fwd	catctctttagtcatggctgtctg
(ZK84.6)	cel_ ins-6_002 rev	ggacaacaagcagatcttatgtagtc
cel_ins-7_001	cel_ins-7_001 fwd	gcatgcgaatcgaatactgaagtta
(ZK1251.2)	cel_ins-7_001 rev	gttttcgaatgaagtcgtcgg
cel_ins-8_001	cel_ins-8_001 fwd	acacacatctttagaggagtcc
(ZK1251.11)	cel_ins-8_001 rev	agacttgctttccgcacaat
cel_ins-9_002	cel_ins-9_002 fwd	ccgctgtggaagaaaactct
(C06E2.8)	cel_ins-9_002 rev	agagatcctgttccgtaccc
cel_ins-10_001	cel_ins-10_001 fwd	tcctcgtaacattggctccc
(T08G5.12)	cel_ins-10_001 rev	cagtctgtcaatgctccaatct
cel_ins-11_001	cel_ins-11_001 fwd	taatcatgaaggtgatgcaga
(F21E9.4)	cel_ins-11_001 rev	ggtgcagctcgctaacattt
cel_ins-12_002	cel_ins-12_002 fwd	gcgatgaagtcgttgtgtagt
(C17C3.19)	cel_ins-12_002 rev	cttggcaacacttagttgcag
cel_ins-13_001	cel_ins-13_001 fwd	ctgttattccaatcgtgctct
(C17C3.18)	cel_ins-13_001 rev	tcgaacaacaagtcacgagta
cel_ins-14_001	cel_ins-14_001 fwd	atgcgatgcaaagttcatttcg
(F41G3.16)	cel_ins-14_001 rev	tgagctttggagcagtgagat
cel_ins-15_001	cel_ins-15_001 fwd	attgtggtttttgctcttttggc
(F41G3.17)	cel_ins-15_001 rev	ggctcaacgattccccaca
cel_ins-16_003	cel_ins-16_003 fwd	ctgcctcctcacactgtcag
(Y39A3A.5)	cel_ins-16_003 rev	atttctgcatcactttcagttcc
cel_ins-17_001	cel_ins-17_001 fwd	atcactcgggacactatccga
(F56F3.6)	cel_ins-17_001 rev	gcaaatcaagttgaaagcgtca
cel_ins-18_001	cel_ins-18_001 fwd	taacacaatggtccaccgac
(T28B8.2)	cel_ins-18_001 rev	cacattttcatgcgtccgtc
cel_ins-19_003	cel_ins-19_003 fwd	agagtatgcgtgaaggatatagatc
(T10D4.13)	cel_ins-19_003 rev	acttcctcactgcaaatatgcttc
cel_ins-20_001	cel_ins-20_001 fwd	gctcgaatgttgatgataacct
(ZK84.7)	cel_ins-20_001 rev	ttcattctggacagcaccgt
cel_ins-21_001	cel_ins-21_001 fwd	aagcggtcaaacacattcgg
(M04D8.1)	cel_ins-21_001 rev	tgagaatccgagtaccccatc
cel_ins-22_001	cel_ins-22_001 fwd	tacgtcagaactctgtgtgga
(M04D8.2)	cel_ins-22_001 rev	gcttggatactctccggtaga
cel_ins-23_001	cel_ins-23_001 fwd	cagagcttcacgttcgtagg
(M04D8.3)	cel_ins-23_001 rev	tgggcacaatcgcattatgt
cel_ins-24_001	cel_ins-24_001 fwd	gcactatgccatgtcttctcg
(ZC334.3)	cel_ins-24_001 rev	agtcccatctccttgaggct
cel_ins-25_001	cel_ins-25_001 fwd	ctccagctttctgaagccaaa
(ZC334.8)	cel_ins-25_001 rev	ttgtggcaatgtcaacgctt
cel_ins-26_001	cel_ins-26_001 fwd	cggaactatgatgcactcgt
(ZC334.1)	cel_ins-26_001 rev	aatagcttcatggttgggca
cel_ins-27_002	cel_ins-27_002 fwd	gccgcttaattccctatgtcta
(ZC334.11)	cel_ins-27_002 rev	gacagcaagccttttggactt
cel_ins-28_001	cel_ins-28_001 fwd	cttggctctgctcgcaatag
(ZC334.9)	cel_ins-28_001 rev	ggcaatcagttcgtggtgag
cel_ins-29_001	cel_ins-29_001 fwd	ttgaactagcttcgtgggca
(ZC334.10)	cel_ins-29_001 rev	gcaagatttgaaggacagcaca
cel_ins-30_001	cel_ins-30_001 fwd	cagttcacgctgatgacctc
(ZC334.2)	cel_ins-30_001 rev	aagacgaatggtgtctgggg
cel_ins-31_001	cel_ins-31_001 fwd	gtttgccagaccggagaaaa
(T10D4.4)	cel_ins-31_001 rev	ttgatgtcttcaccgcacac
cel_ins-32_002	cel_ins-32_002 fwd	taggcgactaagtaagacggt
(Y8A9A.6)	cel_ins-32_002 rev	gttgcgatgtcctcctcctt
cel_ins-33_001	cel_ins-33_001 fwd	caacagctccgatgaagtctc
(W09C5.4)	cel_ins-33_001 rev	cgtcgtcgaagaggctatgt
cel_ins-34_002	cel_ins-34_002 fwd	gacagtcttccattccgaaagc
(F52B11.6)	cel_ins-34_002 rev	ccagatggagctttggttgtagt
cel_ins-35_001	cel_ins-35_001 fwd	caataatcgtcactgccaacg
(K02E2.4)	cel_ins-35_001 rev	atcaccgttgagccacatcc
cel_ins-36_001	cel_ins-36_001 fwd	cacccagaagggaaattggtt
(Y53H1A.4)	cel_ins-36_002 rev	tttgggcagcataattcacga
cel_ins-37_001	cel_ins-37_001 fwd	gccttccttccctatcgttc
(F08G2.6)	cel_ins-37_001 rev	actgctgcgatctttcttccc
cel_ins-38_004	cel_ins-38_004 fwd	tttctcctcgtctgcatcgc
(F08G2.6)	cel_ins-38_004 rev	gagatttttcatcgggggtaaaacta
cel_ins-39_004	cel_ins-39_004 fwd	gtttccattccacaaggctaatacc
(F21E9.4)	cel_ins-39_004 rev	tcttctgcattgcctccatgtt
